# Supplementary material for: Preparation of mesoporous chitosan iron supported nano-catalyst for the catalyzed oxidation of primary amine to imine
Source: Royal Society of Chemistry journal article supplement (doi:10.1039/d3ra05357a), 2023-01-01
Supplement: d3ra05357a1.pdf [file d3ra05357a1.pdf]

## Supplemental information

### The turnover frequency (TOF) calculation

TOF is calculated according to the following formula:

$$TOF = \frac{n_1 \alpha}{n_2 t}$$

Where  $n_1$  is the mole of substrate (0.5mmol),  $\alpha$  is the conversion rate of substrate (95.9%),  $n_2$  is the mole of the metal (0.98mmol %),  $t$  is the reaction time (24h).

$$TOF=2.04 \text{ h}^{-1}$$

### The turnover number (TON) calculation

TON is calculated according to the following formula:

$$TON = \frac{TON}{t}$$

$$TON=48.96$$
